# Supplementary material for: Bolstering General Practitioner Palliative Care: A Critical Review of Support Provided by Australian Guidelines for Life-Limiting Chronic Conditions
Source: MDPI journal article supplement (doi:10.3390/healthcare8040553), 2020-12-11
Supplement: s1 [file s1]

# **SUPPLEMENTARY FILE S1. SEARCH STRATEGIES FOR IDENTIFYING GUIDELINES**

Table S1. Ovid MEDLINE search strategy

| #  | Searches                                                                                                           |
|----|--------------------------------------------------------------------------------------------------------------------|
| 1  | Critical Pathways/                                                                                                 |
| 2  | Clinical Protocols/                                                                                                |
| 3  | Consensus/                                                                                                         |
| 4  | consensus development conference/ or consensus development conference, nih/                                        |
| 5  | consensus development conferences as topic/ or consensus development conferences, nih as topic/                    |
| 6  | guideline/ or practice guideline/                                                                                  |
| 7  | guidelines as topic/ or practice guidelines as topic/                                                              |
| 8  | Health Planning Guidelines/                                                                                        |
| 9  | (consensus development conference or consensus development conference, nih or guideline or practice guideline).pt. |
| 10 | (position statement* or policy statement* or practice parameter* or best practice*).ti,kf,kw.                      |
| 11 | (standards or guideline or guidelines).ti,kf,kw.                                                                   |
| 12 | ((practice or treatment* or clinical) adj guideline*).ab.                                                          |
| 13 | (CPG or CPGs).ti.                                                                                                  |
| 14 | consensus*.ti,kf,kw.                                                                                               |
| 15 | consensus*.ab. /freq=2                                                                                             |
| 16 | ((critical or clinical or practice) adj2 (path or paths or pathway or pathways or protocol*)).ti,kf,kw.            |
| 17 | recommenda*.ti,kf,kw.                                                                                              |
| 18 | (care adj2 (standard or path or paths or pathway or pathways or map or maps or plan or plans)).ti,kf,kw.           |
| 19 | (algorithm* adj2 (pharmacotherap* or therap* or treatment* or intervention*)).ti,kf,kw.                            |
| 20 | or/1-19                                                                                                            |
| 21 | exp *neoplasms/                                                                                                    |

|    |                                                                                                                                                                                                                                 |
|----|---------------------------------------------------------------------------------------------------------------------------------------------------------------------------------------------------------------------------------|
| 22 | (Cancer* or melanoma* or myeloma* or sarcoma* or lymphoma* or neuroblastoma* or retinoblastoma* or osteosarcoma* or tumor* or tumour* or malignan* or neoplas* or leukemia* or leukaemia* or carcinoma* or adenocarcinoma*).ti. |
| 23 | exp *Coronary Disease/                                                                                                                                                                                                          |
| 24 | ((Coronary or ischemi* or ischaemi*) adj2 disease*).ti.                                                                                                                                                                         |
| 25 | exp *Dementia/ or (dementia* or Alzheimer* or frontotemporal lobar degeneration* or pick disease* or picks disease*).ti.                                                                                                        |
| 26 | *cardiovascular diseases/ or cardiovascular disease*.ti.                                                                                                                                                                        |
| 27 | *Myocardial Ischemia/ or *Heart diseases/                                                                                                                                                                                       |
| 28 | ((myocardial or heart) adj (disease* or ischemi* or ischaemi*)).ti.                                                                                                                                                             |
| 29 | exp *cardiomyopathies/ or exp *heart failure/                                                                                                                                                                                   |
| 30 | (cardiomyopath* or heart failure).ti.                                                                                                                                                                                           |
| 31 | *Pulmonary Disease, Chronic Obstructive/ or (chronic obstructive pulmonary disease* or COPD).ti.                                                                                                                                |
| 32 | *renal insufficiency, chronic/ or *kidney failure, chronic/                                                                                                                                                                     |
| 33 | (Chronic adj (renal or kidney)).ti.                                                                                                                                                                                             |
| 34 | *liver failure/ or *end stage liver disease/                                                                                                                                                                                    |
| 35 | ((liver or hepatic) adj (failure or disease*)).ti.                                                                                                                                                                              |
| 36 | (chronic adj (liver or hepatic)).ti.                                                                                                                                                                                            |
| 37 | *neurodegenerative diseases/ or *lewy body disease/ or *motor neuron disease/ or *amyotrophic lateral sclerosis/ or *bulbar palsy, progressive/ or *muscular atrophy, spinal/ or *parkinson disease/                            |
| 38 | (neurodegenerative or lewy body or motor neuron* or amyotrophic lateral sclerosis or progressive bulbar palsy or parkinson* or (MND or ALS)).ti.                                                                                |
| 39 | *multiple sclerosis/ or *multiple sclerosis, chronic progressive/ or *multiple sclerosis, relapsing-remitting/                                                                                                                  |
| 40 | multiple sclerosis.ti.                                                                                                                                                                                                          |
| 41 | or/21-40                                                                                                                                                                                                                        |
| 42 | exp Australia/ or (australia* or australasia* or new south wales* or victoria* or queensland* or tasmania* or northern territory*).ti,ab,kw,kf.                                                                                 |
| 43 | 20 and 41 and 42                                                                                                                                                                                                                |
| 44 | limit 43 to yr="2012 -Current"                                                                                                                                                                                                  |
| 45 | limit 44 to english language                                                                                                                                                                                                    |

6

7 **Notes:**

8 Includes database subsets: Ovid Medline (1946 to August 03, 2018); Epub Ahead of Print,  
9 In-Process & Other Non-Indexed Citations; Daily; and Versions.

10 Lines 1-19 represent the 'guidelines' part of the search. This is based on an existing search  
11 by Canadian Agency for Drugs and Technologies in Health (CADTH).  
12 / = Medical Subject Heading (MeSH) search; ti = title field search; ab = abstract field  
13 search; kw = exact author keyword field search; kf = author keyword field search; pt =  
14 publication type field search; adj2 = search words can occur within two spaces of each  
15 other, in either order; ab. /freq=2 = words must appear with a frequency of 2 (i.e. twice)  
16 within the abstract field.  
17

## Sources used to identify Australian clinical practice guidelines

### Guideline repositories and sources of evidence summaries

- Clinical Practice Guidelines Portal (Australia):  
<https://www.clinicalguidelines.gov.au/portal>
- Guidelines International Network (GIN): <http://www.g-i-n.net/>  
MJA's 'Guidelines and Statements' section:  
<https://www.mja.com.au/journal/guidelines>
- eTG Complete (subscription resource)
- Australian Medicines Handbook (subscription resource)
- Handbook of Non-Drug Interventions: HANDI: <https://www.racgp.org.au/clinical-resources/clinical-guidelines/handi>

### Medical speciality colleges or societies, or organisations

- Royal Australian College of General Practitioners (RACGP):  
<https://www.racgp.org.au/>
- Royal Australian College of Physicians (RACP): <https://www.racp.edu.au/>
- Centre for Remote Health: <https://www.crh.org.au/remote-phc-manuals-overview>
  - CARPA Standard Treatment Manual
  - Minymaku Kutju Tjukurpa: Women's Business Manual
- Australian Primary Health Care Research Institute:  
<https://rsph.anu.edu.au/research/centres-departments/australian-primary-health-care-research-institute>
- AusDoc.Plus 'Guide to Guidelines': <https://www.ausdoc.com.au/guidetoguidelines>

### Palliative care organisational websites

- Palliative Care Australia (PCA): <https://palliativecare.org.au/>
- CareSearch: <https://www.caresearch.com.au/Caresearch/Default.aspx>
- End of Life Directions for Aged Care (ELDAC): <https://www.eldac.com.au/>
- PalliAGED: <https://www.palliaged.com.au/>

### Condition-specific organisational websites

- Cancer Council Australia (CCA): <https://wiki.cancer.org.au/australia/Guidelines>
- Cancer Australia: <https://canceraustralia.gov.au/>
- Clinical Oncological Society of Australia (COSA): <https://www.cosa.org.au/>
- Australian Heart Foundation: <https://www.heartfoundation.org.au/>
- Cardiac Society of Australia and New Zealand: <http://www.csanz.edu.au/>
- Lung Foundation Australia: <https://lungfoundation.com.au/>
- Thoracic Society of Australia and New Zealand: <https://www.thoracic.org.au/>

- 57 • Kidney Health Australia: <http://kidney.org.au/>
- 58 • Gastroenterological Society of Australia (GESA): <http://www.gesa.org.au/>
- 59 • Australian Liver Foundation: <http://liver.org.au/>
- 60 • Dementia Australia: <https://www.dementia.org.au/>
- 61 • MND Australia: <https://www.mndaust.asn.au/>
- 62 • Parkinson's Australia: <https://www.parkinsons.org.au/>
- 63 • MS Australia: <https://www.msaustralia.org.au/>

#### 64 Government sites

- 65 • Australian Government Department of Health: <https://www.health.gov.au/>
- 66 • National Health and Medical Research Committee (NHMRC):
- 67 <https://www.nhmrc.gov.a>
